# Supplementary material for: Synthesis of “(aminomethyl)phosphonic acid-functionalized graphene oxide”, and comparison of its adsorption properties for thorium(IV) ion, with plain graphene oxide
Source: publisher site journal article supplement (doi:10.1515/ract-2021-1090), 2021-11-29
Supplement: Supplementary file 1 [file j_ract-2021-1090_suppl.docx]

**Supporting Information**


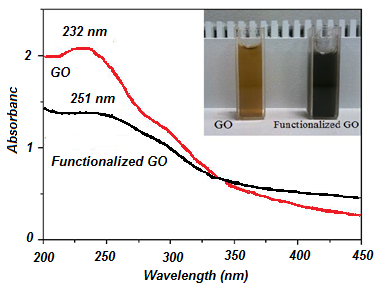


**Figure S1.** The UV-visible spectra of GO, and AMPA-GO hybrid.

**
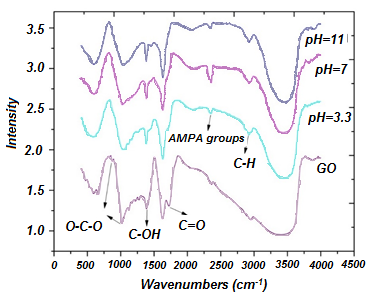
**

**Figure S2.**  The FTIR spectra of the GO and AMPA-GO, functionalized at different pHs.

| 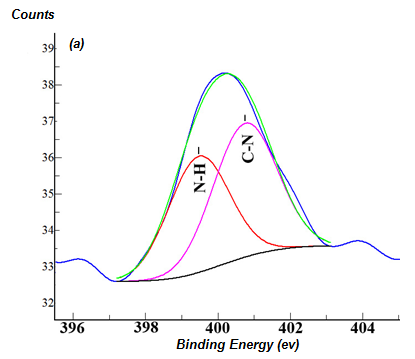 | 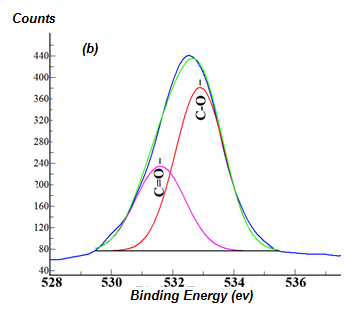 |
| --- | --- |
| 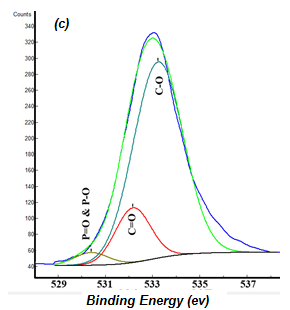 |  |

**Figure S3.** The N1s spectra of AMPA-GO showing the N-C bonds on the surface of GO a) 396-402 ev, b)528-536 ev and c) 529-537 ev

**Figure S4.** The plot of the Freundlich adsorption isotherm model, (Time= 15 min, pH= 2, Solution volume= 25 mL, Adsorbent content= 20 mg, Shake= 200 rpm, Temperature = 25 °C)

Table S1. Freundlich isotherm model parameters

| **Adsorbent** | **n** | **KF** | **R2** |
| --- | --- | --- | --- |
| GO | 5.64 | 77.3 | 0.813 |
| AMPA-GO | 6.8 | 52.3 | 0.855 |

Table S2. Speciation of thorium as a function of pH

| **pH** | **Species** |
| --- | --- |
| >10 | Th(OH)4>99% |
| <4.5 | Th(OH)4>25%  Th(OH)3+>12%  Th(OH)22+>40%  Th(OH)3+>18% |
| 3.5 | Th(IV)=26.5%  Th(OH)3+>42.8%  Th(OH)22+>29%  Th(OH)3+ andTh(OH)4>1.7% |
| <3 | Th(IV)>88%  Th(OH)3+<12% |

Figure S5. The effect HNO3 concentration on Th(IV) adsorption by GO and AMPA-GO adsorbent (Time= 15 min, Solution volume= 25 mL, Adsorbent content= 20 mg, Shake= 200 rpm, Th(IV) concentration = 105 mg L-1, Temperature = 25 °C)

Figure S6. Effect of the adsorbent dose on adsorption of Th(IV) by GO and AMPA-GO (Time= 15 min, pH= 2, Shake= 200 rpm, Th (IV) concentration = 250 mg L-1, Temperature = 25 °C)
